# Supplementary material
Source: PubMed Central journal article supplement (PMC6249688)
Supplement: NIHMS989336-supplement-Suppl_1.pdf [file NIHMS989336-supplement-Suppl_1.pdf]

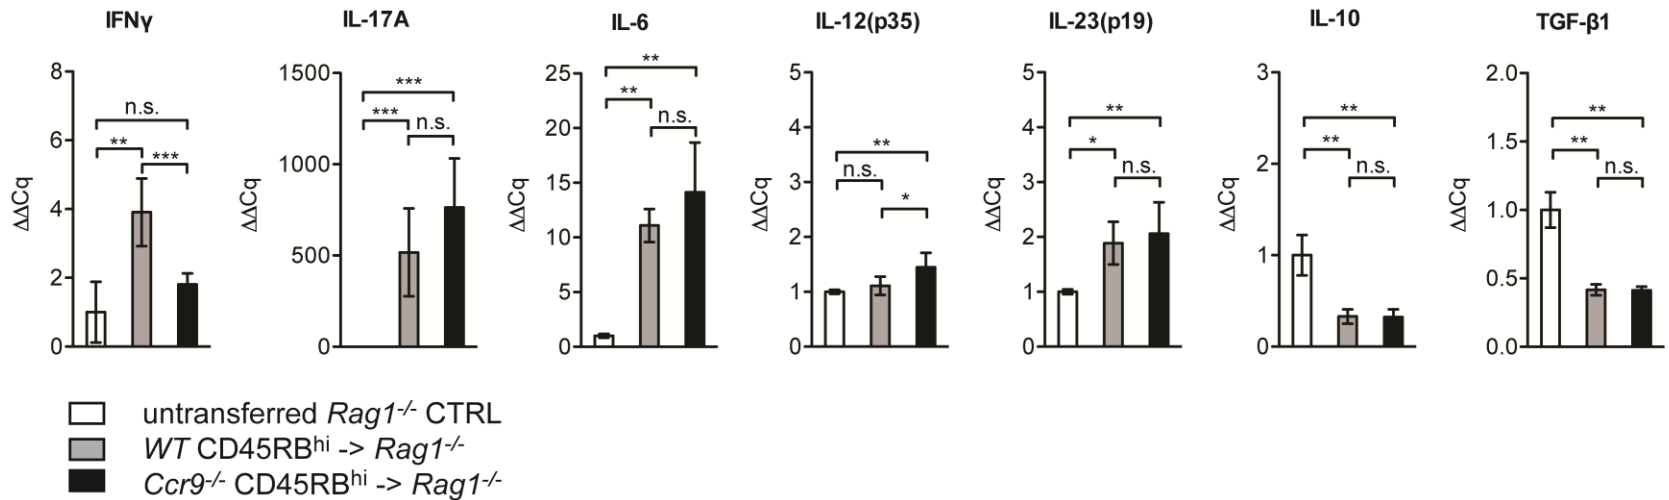

**Supplemental Digital Content 1.** Transfer of *Ccr9*<sup>-/-</sup> CD45RB<sup>hi</sup> CD4<sup>+</sup> T cells induces colonic inflammatory responses. mRNA profiling of *Rag1*<sup>-/-</sup> colonic tissue following transfer of WT or *Ccr9*<sup>-/-</sup> CD45RB<sup>hi</sup> CD4<sup>+</sup> T cells. mRNA transcripts were quantified by qPCR and normalized to HPRT and to untransferred *Rag1*<sup>-/-</sup> control mice. Data representative of 1 experiment out of 4. P values, \*: p<0.05; \*\*: p<0.005; \*\*\*: p<0.0005; ns: not significant.
