# Supplementary material
Source: PubMed Central journal article supplement (PMC6249688)
Supplement: NIHMS989336-supplement-Suppl_2.pdf [file NIHMS989336-supplement-Suppl_2.pdf]

**A**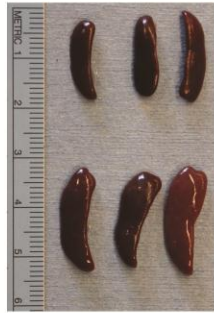CD45RB<sup>hi</sup> →  $Rag1^{-/-}$ CD45RB<sup>hi</sup> →  $Rag1^{-/-}Ccl25^{-/-}$ **B**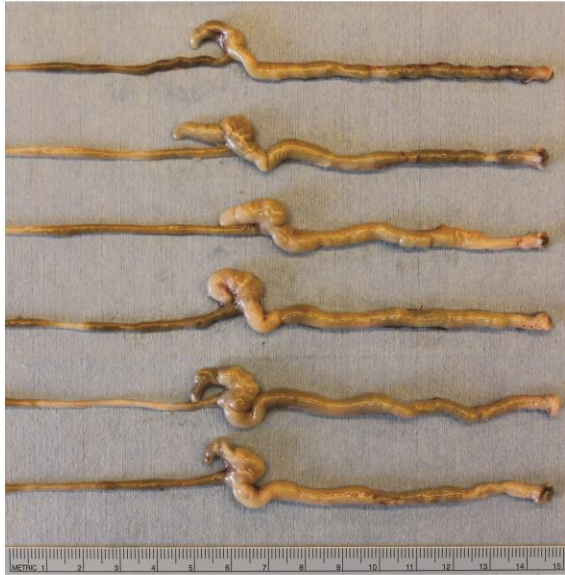CD45RB<sup>hi</sup> →  $Rag1^{-/-}$   
CD45RB<sup>hi</sup> →  $Rag1^{-/-}Ccl25^{-/-}$ **C**CD45RB<sup>hi</sup> →  $Rag1^{-/-}$ CD45RB<sup>hi</sup> →  $Rag1^{-/-}Ccl25^{-/-}$ 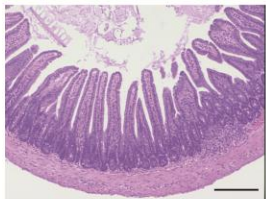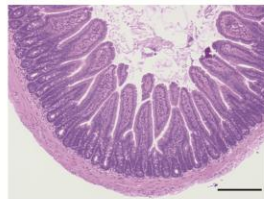

Ileum

**Supplemental Digital Content 2.**

Enhanced colitis and splenomegaly in  $Rag1^{-/-}Ccl25^{-/-}$  recipient mice following WT naïve T cell transfer.

(A) Macroscopic view of SPLs harvested from  $Rag1^{-/-}$  and  $Rag1^{-/-}Ccl25^{-/-}$  host mice adoptively transferred with naïve CD45RB<sup>hi</sup> CD4<sup>+</sup> T cells. Data representative of 1 experiment out of 5.

(B) Macroscopic view of terminal ileums, caecums and colons harvested from  $Rag1^{-/-}$  and  $Rag1^{-/-}Ccl25^{-/-}$  host mice adoptively transferred with naïve CD45RB<sup>hi</sup> CD4<sup>+</sup> T cells.

(C) Representative H&E staining of  $Rag1^{-/-}$  and  $Rag1^{-/-}Ccl25^{-/-}$  ileums isolated from recipient mice after naïve CD4<sup>+</sup> T cell transfer.
